# Supplementary material for: Analysis of miRNA Expression Profiling of RIP2 Knockdown in Chicken HD11 Cells When Infected with Avian Pathogenic E. coli (APEC)
Source: MDPI journal article supplement (doi:10.3390/ijms23137319), 2022-06-30
Supplement: s1 [file s1]

## Legends for the supplementary figures

Figure S1 Characteristics of small RNA in wild type (WT), *RIP2* knockdown (shRIP2), avian pathogenic *E. coli* infection (APEC), and *RIP2* knockdown combined with APEC infection group (shRIP2+APEC). A. Read length distribution statistics in different groups. B. The distribution of reads on the functional elements of *gallus gallus* 6.0 genome in different groups. C. The density distribution of reads on each chromosome for different groups.

Figure S2 miRNA nucleotide bias analysis results. A and C. Proportion of known (A) and novel miRNA (C) first nucleotide bias. B and D. Proportion of known (B) and novel miRNA (D) nucleotide bias at each position.

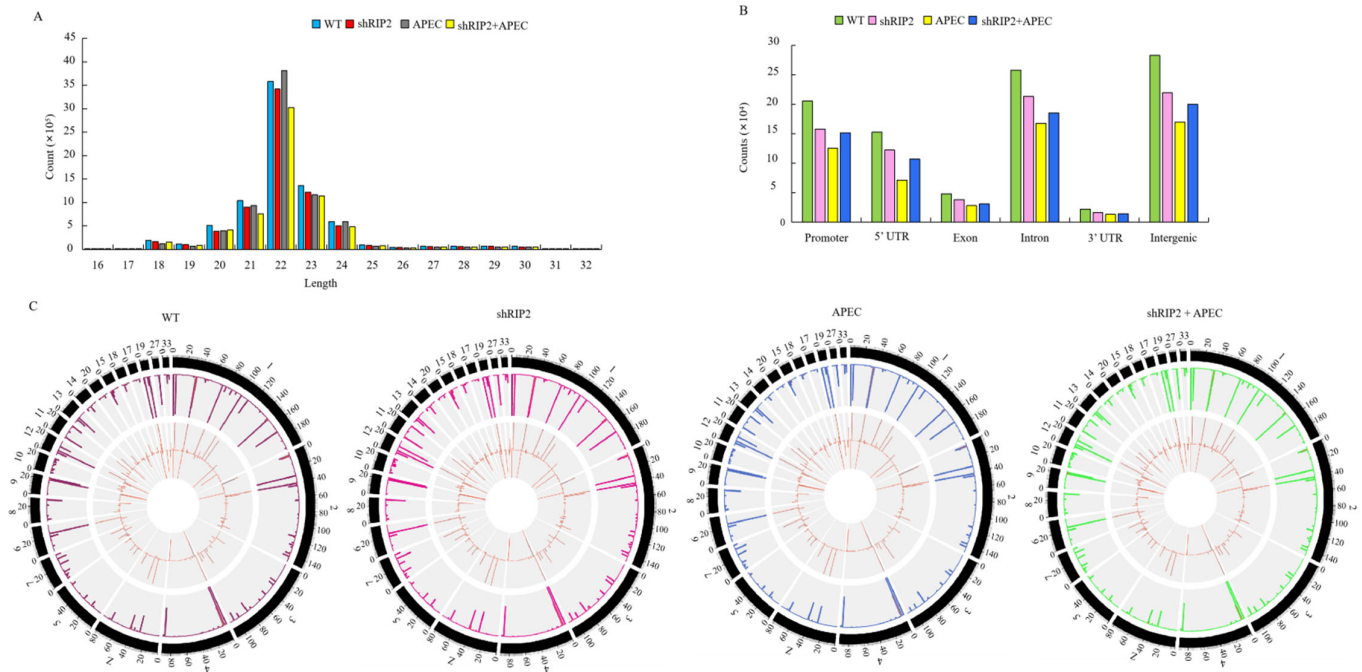

**Figure S1** Characteristics of small RNA in wild type (WT), *RIP2* knockdown (shRIP2), avian pathogenic *E. coli* infection (APEC), and *RIP2* knockdown combined with APEC infection group (shRIP2+APEC). A. Read length distribution statistics in different groups. B. The distribution of reads on the functional elements of *gallus gallus* 6.0 genome in different groups. C. The density distribution of reads on each chromosome for different groups.

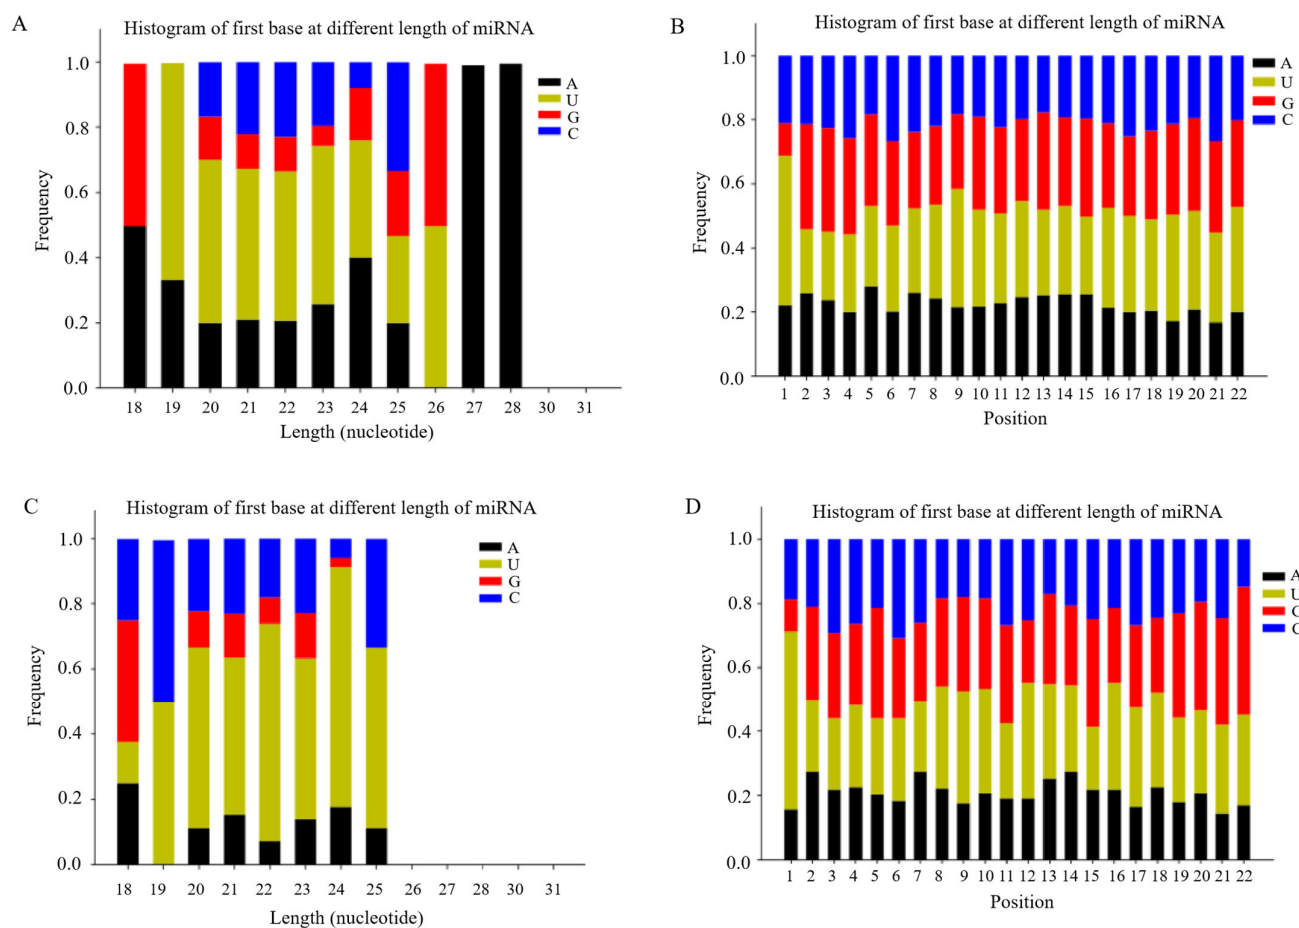

**Figure S2** miRNA nucleotide bias analysis results. A and C. Proportion of known (A) and novel miRNA (C) first nucleotide bias. B and D. Proportion of known (B) and novel miRNA (D) nucleotide bias at each position.

## Legends for the supplementary tables

Table S1 Characteristics of RNA sequencing data before or after quality control

Table S2 The reads mapping information for each sample

Table S3 shRNA information for *RIP2*

Table S4 The information for wild type and mutant 3' UTR of *IRF2*

Table S5 The information of gga-miR-455-5p mimics and inhibitor

Table S6 Primers for *RIP2*, *IRF2*, and inflammatory genes in RT-qPCR experiment

Table S7 Primers for candidate miRNAs by RT-qPCR

Table S1 Characteristics of RNA sequencing data before or after quality control

| Samples       | Raw reads  | Clean reads            | N%>1%           | Adaptor<br>contaminate | Low quality        | Length < 18 nt<br>or Length > 30 nt |
|---------------|------------|------------------------|-----------------|------------------------|--------------------|-------------------------------------|
| WT_1          | 24,577,952 | 11,363,586<br>(46.23%) | 12<br>(0.0%)    | 104,886<br>(0.43%)     | 387,585<br>(1.58%) | 12,721,883<br>(51.76%)              |
| WT_2          | 21,113,215 | 9,915,189<br>(46.96%)  | 10<br>(0.0%)    | 75,441<br>(0.36%)      | 272,540<br>(1.29%) | 10,850,035<br>(51.39%)              |
| WT_3          | 23,425,323 | 11,007,959<br>(46.99%) | 13<br>(0.0%)    | 90,582<br>(0.39%)      | 347,961<br>(1.49%) | 11,978,808<br>(51.14%)              |
| shRIP2_1      | 20,707,422 | 10,373,329<br>(50.09%) | 10<br>(0.0%)    | 78,042<br>(0.38%)      | 286,785<br>(1.38%) | 9,969,256<br>(48.14%)               |
| shRIP2_2      | 21,160,012 | 10,506,782<br>(49.65%) | 7<br>(0.0%)     | 82,933<br>(0.39%)      | 305,553<br>(1.44%) | 10,264,737<br>(48.51%)              |
| shRIP2_3      | 22,966,845 | 11,490,468<br>(50.03%) | 10 (0.0%)       | 85,487<br>(0.37%)      | 347,839<br>(1.51%) | 11,043,041<br>(48.08%)              |
| APEC_1        | 16,497,027 | 8,985,290<br>(54.47%)  | 0<br>(0.0%)     | 80,717<br>(0.49%)      | 251,258<br>(1.52%) | 7,179,762<br>(43.52%)               |
| APEC_2        | 16,843,042 | 9,152,665<br>(54.34%)  | 0<br>(0.0%)     | 84,683<br>(0.5%)       | 269,021<br>(1.6%)  | 7,336,673<br>(43.56%)               |
| APEC_3        | 27,907,143 | 15,601,765<br>(55.91%) | 2068<br>(0.01%) | 129,867<br>(0.47%)     | 461,714<br>(1.65%) | 11,711,729<br>(41.97%)              |
| shRIP2+APEC_1 | 18,655,185 | 8,993,311<br>(48.21%)  | 0<br>(0.0%)     | 84,894<br>(0.46%)      | 280,801<br>(1.51%) | 9,296,179<br>(49.83%)               |
| shRIP2+APEC_2 | 18,654,422 | 9,064,973<br>(48.59%)  | 0<br>(0.0%)     | 76,288<br>(0.41%)      | 280,328<br>(1.5%)  | 9,232,833<br>(49.49%)               |
| shRIP2+APEC_3 | 17,635,198 | 8,548,952<br>(48.48%)  | 0<br>(0.0%)     | 78,151<br>(0.44%)      | 273,596<br>(1.55%) | 8,734,499<br>(49.53%)               |

Note: WT indicates wild type; shRIP2 means knockdown of *RIP2* HD11 cells; APEC represents avian pathogenic *E. coli* infection; shRIP2+APEC indicates knockdown of *RIP2* HD11 cells combined with APEC infection; nt means nucleotide.

Table S2 The reads mapping information for each sample

| Samples  | Clean unique reads | Clean total reads | Mapped unique reads | Mapped total reads | Mapping rate |
|----------|--------------------|-------------------|---------------------|--------------------|--------------|
| WT_1     | 270,938            | 8,206,252         | 237,948             | 7,972,378          | 97.15%       |
| WT_2     | 250,850            | 7,294,159         | 220,887             | 7,083,121          | 97.11%       |
| WT_3     | 274,643            | 8,002,584         | 237,031             | 7,736,290          | 96.67%       |
| shRIP2_1 | 227,847            | 6,883,482         | 201,746             | 6,615,212          | 96.10%       |
| shRIP2_2 | 228,910            | 6,986,488         | 202,917             | 6,714,661          | 96.11%       |
| shRIP2_3 | 238,961            | 7,372,155         | 211,852             | 7,084,657          | 96.10%       |
| APEC_1   | 170,405            | 6,199,420         | 148,566             | 5,995,491          | 96.71%       |

|               |         |           |         |           |        |
|---------------|---------|-----------|---------|-----------|--------|
| APEC_2        | 173,199 | 6,290,667 | 151,035 | 6,080,291 | 96.66% |
| APEC_3        | 244,563 | 9,723,002 | 209,834 | 9,392,915 | 96.61% |
| shRIP2+APEC_1 | 220,075 | 6,526,083 | 194,078 | 6,329,463 | 96.99% |
| shRIP2+APEC_2 | 220,372 | 6,523,876 | 194,765 | 6,326,277 | 96.97% |
| shRIP2+APEC_3 | 211,262 | 6,174,384 | 186,449 | 5,988,857 | 97.00% |

Note: WT indicates wild type; shRIP2 means knockdown of *RIP2* HD11 cells; APEC represents avian pathogenic *E. coli* infection; shRIP2+APEC indicates knockdown of *RIP2* HD11 cells combined with APEC infection.

Table S3 shRNA information for *RIP2*

| ID       | 5'          | stem                      | loop      | stem                      | 3'      |
|----------|-------------|---------------------------|-----------|---------------------------|---------|
| NC-F     | GATCC       | GACGAAAGTCAAGACTTCTATTCAA | TTCAAGAGA | TTGAATAGAAGTCTTGACTTTCGTC | TTTTTTG |
| NC-R     | AATTCAAAAAA | GACGAAAGTCAAGACTTCTATTCAA | TCTCTTGAA | TTGAATAGAAGTCTTGACTTTCGTC | G       |
| shRNA1-F | GATCC       | ACAGTGATAGAAACCACCTTCTAAA | TTCAAGAGA | TTTAGAAGGTGGTTTCTATCACTGT | TTTTTTG |
| shRNA1-R | AATTCAAAAAA | ACAGTGATAGAAACCACCTTCTAAA | TCTCTTGAA | TTTAGAAGGTGGTTTCTATCACTGT | G       |
| shRNA2-F | GATCC       | GACTTAAGTGAAACCAGCTTATCAA | TTCAAGAGA | TTGATAAGCTGGTTTCACTTAAGTC | TTTTTTG |
| shRNA2-R | AATTCAAAAAA | GACTTAAGTGAAACCAGCTTATCAA | TCTCTTGAA | TTGATAAGCTGGTTTCACTTAAGTC | G       |
| shRNA3-F | GATCC       | ACAAACAGCTAGGACTTCAACCTTA | TTCAAGAGA | TAAGGTTGAAGTCCTAGCTGTTTGT | TTTTTTG |
| shRNA3-R | AATTCAAAAAA | ACAAACAGCTAGGACTTCAACCTTA | TCTCTTGAA | TAAGGTTGAAGTCCTAGCTGTTTGT | G       |

Table S4 The information for wild type and mutant 3' UTR of *IRF2*

| Name                              | Synthesized Sequence                                                                                                                                                                                                  |
|-----------------------------------|-----------------------------------------------------------------------------------------------------------------------------------------------------------------------------------------------------------------------|
| <i>IRF2</i> wild type<br>(3' UTR) | GCTAGCaatattgtacatagtgagtagtagcaacgttgagtagtctctgcacctaattaagaaagcacttacaaaaggcctttt<br>attaccttgctctacttaattggcacattgaagggtccctccccacctgtattctttccaaggctattcttgctaaagtgctttaagaatag<br>tggaaggaagaaagtaaaacttcCTCGAG |
| <i>IRF2</i> mutation<br>(3' UTR)  | GCTAGCaatattgtacatagtgagtagtagcaacgttgagtagtctctgcacctaattaagaaagcacttacaaaaggcctttt<br>ttaccttgctctacttaatttacagtggaagggtccctccccacctgtattctttccaaggctattcttgctaaagtgctttaagaatag<br>ggaaaggaagaaagtaaaacttcCTCGAG   |

Table S5 The information of gga-miR-455-5p mimics and inhibitor

| Name                                      | Sequence                 |
|-------------------------------------------|--------------------------|
| gga-miR-455-5p mimics                     | UAUGUGCCCUUGGACUACAUCG   |
| gga-miR-455-5p mimic negative control     | UCACAACCUCCUAGAAAGAGUAGA |
| gga-miR-455-5p inhibitor                  | CGAUGUAGUCCAAGGGCACAU    |
| gga-miR-455-5p inhibitor negative control | UCUACUCUUUCUAGGAGGUUGUGA |

Table S6 Primers for *RIP2*, *IRF2* and inflammatory genes in RT-qPCR experiment

| Name                          | Gene ID | Forward primer (5'-3') | Reverse primers (5'-3') |
|-------------------------------|---------|------------------------|-------------------------|
| <i>RIP2</i>                   | 420215  | CTCGAACCAGTCCTGAGAACG  | AAGCGGATGTTTCCTCTTGG    |
| <i>IRF2</i>                   | 396115  | TGTTTGCCAGGTAGTAGAGG   | ACGCTGTCGGTCGTTTCAC     |
| <i>IL8</i>                    | 395872  | GAGTTCACTGACCACCCT     | TGCCTGAGCCATACCTTT      |
| <i>IFN<math>\alpha</math></i> | 396398  | GACAGCCAACGCCAAAGC     | GTCGCTGCTGTCCAAGCATT    |
| <i>IFN<math>\beta</math></i>  | 554219  | CGTCACCAGGATGCCAACT    | AGCCGTATTCTGAAGGAGC     |
| <i>IL6</i>                    | 395337  | GGAGAAATGCCTGACGAA     | GGATTGTGCCCCGAACTAA     |
| <i>IL1<math>\beta</math></i>  | 395196  | CGCTTCATCTTCTACCGC     | CCAGTCACAATAAATACCTCCA  |

Table S7 Primers for candidate miRNAs by RT-qPCR

| Name            | Primer sequence(5'-3')    |
|-----------------|---------------------------|
| gga-miR-455-5p  | TATGTGCCCTTGACTACATCG     |
| gga-miR-99a-5p  | AACCCGTAGATCCGATCTTGTG    |
| gga-miR-135a-5p | TATGGCTTTTATTCTATGTGA     |
| gga-miR-204     | TTCCCTTTGTCATCCTATGCCT    |
| gga-miR-34b-5p  | CAGGCAGTGTAGTTAGCTGATTG   |
| gga-miR-144-5p  | GGATATCATCATATACTGTAAG    |
| gga-miR-18a-3p  | ACTGCCCTAAGTGCTCCTTCTG    |
| gga-miR-26a-5p  | TTCAAGTAATCCAGGATAGGC     |
| gga-miR-147     | GTGTGCGGAAATGCTTCTGC      |
| gga-miR-1306-5p | ACCACCTCCCCTGCAAACGTCCAGT |
| gga-miR-148a-5p | AAAGTTCTGTGACACTCAGACT    |
